# Supplementary material
Source: publisher site journal article supplement (https://www.spandidos-publications.com/5304/downloadSupplementary)

Figure S1. Representative images from dot blot assays. TNF detection in (A and B) CM from 3T3-L1ad (corresponds to Figs. 1F and 2E, respectively), (C) mammary AT explants from female mice (corresponds to Fig. 3F) and (D) AT adjacent to human breast cancer, expressing low NCoA3 levels (samples 1-3) or high levels (samples 4-6) (corresponds to Fig. 4H). (E) MCP1 detection in CM from AT adjacent to human breast cancer, expressing low NCoA3 levels (samples 1-4) or high levels (samples 5-7 and 9) (corresponds to Fig. 4I). Sample 8 corresponds to culture medium alone. (D and E) Labels a-c correspond to: a, pure CM; b, 1/2 dilution; c, 1/4 dilution. AT, adipose tissue; CM, conditioned medium; MCP1, monocyte chemoattractant protein 1; TNF, tumor necrosis factor.

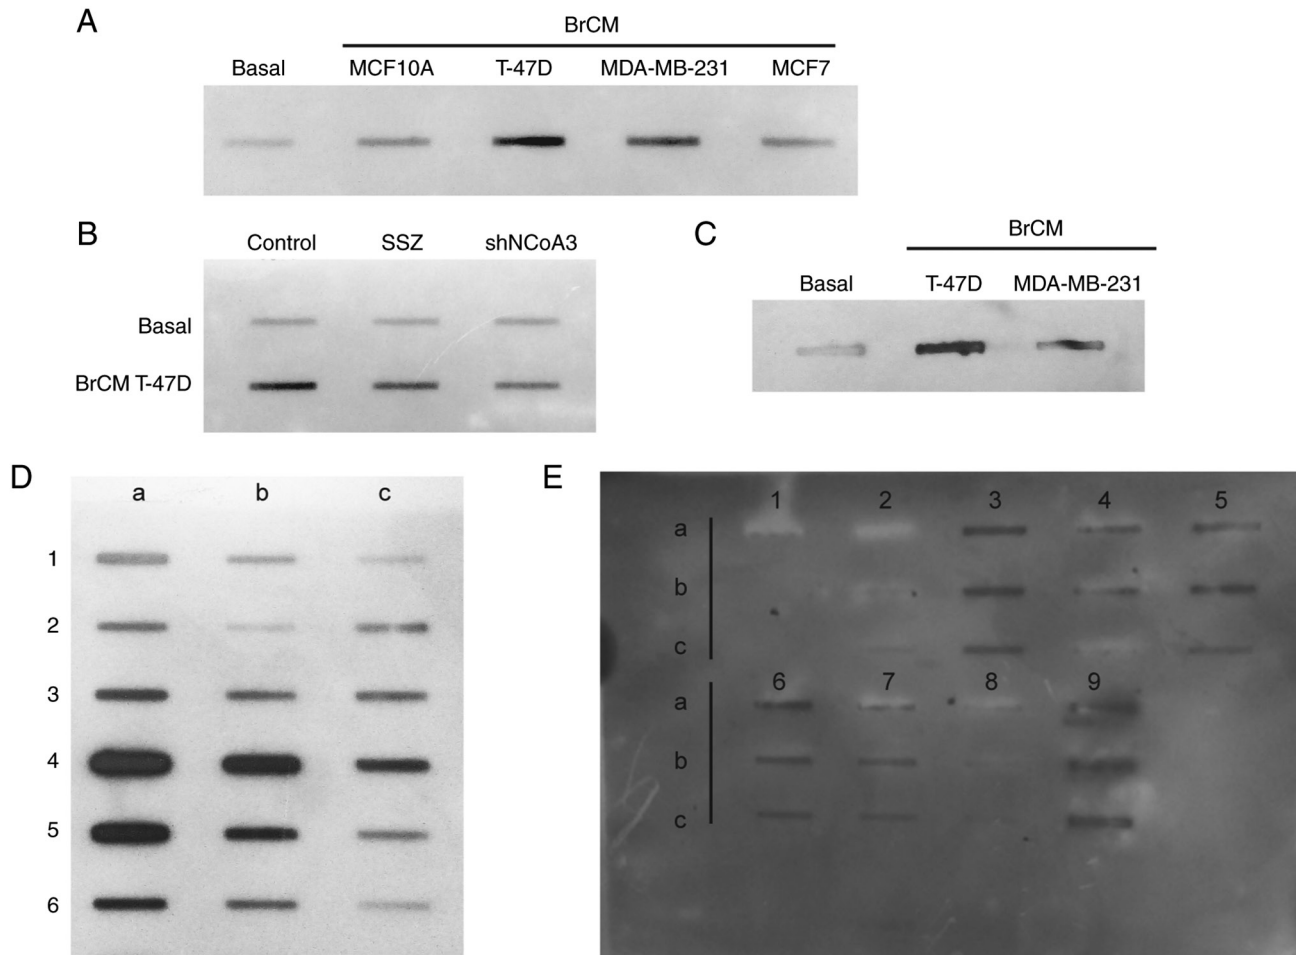

Supplement: Supplementary file 1 [file downloadSupplementary]
